# Not Community-Associated Methicillin-Resistant *Staphylococcus aureus* (CA-MRSA)! A Clinician's Guide to Community MRSA - Its Evolving Antimicrobial Resistance and Implications for Therapy

Kyra Chua,<sup>1,3</sup> Frederic Laurent,<sup>7</sup> Geoffrey Coombs,<sup>4</sup> M. Lindsay Grayson,<sup>1,2,5</sup> and Benjamin P. Howden<sup>1,2,3,6</sup>

<sup>1</sup>Infectious Diseases and <sup>2</sup>Microbiology Departments, Austin Health, Heidelberg, and <sup>3</sup>Department of Microbiology, Monash University, Clayton, <sup>4</sup>Department of Microbiology and Infectious Diseases, PathWest Laboratory Medicine—WA Royal Perth Hospital, Perth, and Departments of <sup>5</sup>Medicine and <sup>6</sup>Microbiology and Immunology, University of Melbourne, Parkville, Australia, and <sup>7</sup>French National Reference Centre for Staphylococci, Inserm U 851, Hospices Civils de Lyon, University of Lyon, Lyon, France

**There is significant diversity in methicillin-resistant *Staphylococcus aureus* (MRSA) clones arising in the community worldwide, with considerable geographical differences in typical antimicrobial resistance profiles. Many community clones of MRSA have a non-multidrug resistant antimicrobial profile, providing increased options for empirical and directed therapy of infections caused by these strains. However, the recent description of increasing non- $\beta$  lactam resistance in community clones of MRSA, especially USA300, provides a timely warning for clinicians making decisions about therapy for patients potentially infected with these strains. Continued monitoring of global epidemiology and emerging drug resistance data is critical for the effective management of these infections.**

Antibiotic resistance has long been a problem with *Staphylococcus aureus*. In particular, methicillin-resistant *S. aureus* (MRSA) rapidly emerged in hospitals after the introduction of methicillin [1]. Although initially a hospital-associated problem, MRSA is well described in patients with no contact with the hospital environment; these isolates have been termed community-associated MRSA or “CA-MRSA”. This phenomenon was first described in patients from the remote Kimberley region in Western Australia in the early 1990s and has subsequently been reported worldwide [2–5]. Although hospital-associated MRSA clones are often

multidrug resistant, many of these newer MRSA clones have retained susceptibility to non- $\beta$  lactam antibiotics, such as macrolides, tetracyclines, quinolones, lincosamides, and trimethoprim-sulfamethoxazole, providing increased options for the treatment of infections caused by these strains. However, recent evolving resistance in these MRSA clones, such as in USA300, threatens the use of some of these agents [6]. This review will describe the global epidemiology of MRSA, with specific emphasis on these newer clones arising in the community; discuss regional data on evolving antibiotic resistance patterns; and the implications for treatment of MRSA infection. Of note, there is potential selection bias in describing community MRSA epidemiology, with some regions more likely to detect, characterize, and report these strains compared with others.

## DEFINING CA-MRSA: THE FIRST HURDLE

Currently, there is no single definition that can reliably distinguish community MRSA from traditional hospital-associated MRSA. The term “CA-MRSA” has been

Received 11 May 2010; accepted 20 September 2010.

Correspondence: Dr Benjamin Howden, Infectious Diseases Dept, Austin Health, PO Box 5555, Heidelberg 3084, Victoria, Australia (benjamin.howden@austin.org.au).

**Clinical Infectious Diseases** 2011;52(1):99–114

© The Author 2011. Published by Oxford University Press on behalf of the Infectious Diseases Society of America. All rights reserved. For Permissions, please e-mail: journals.permissions@oup.com  
1058-4838/2011/521-0001\$37.00  
DOI: 10.1093/cid/ciq067

**Table 1. Examples of Definitions Used for Community-Associated Methicillin-Resistant *Staphylococcus aureus* (CA-MRSA)**

| Reference                                      | Patient Population                                                                                                                                                                                                                                                                                                                                                                                                                                                           | Resistance Phenotype                                                                                                           | Genotype                                                                                                      |
|------------------------------------------------|------------------------------------------------------------------------------------------------------------------------------------------------------------------------------------------------------------------------------------------------------------------------------------------------------------------------------------------------------------------------------------------------------------------------------------------------------------------------------|--------------------------------------------------------------------------------------------------------------------------------|---------------------------------------------------------------------------------------------------------------|
| Centers for Disease Control and Prevention [9] | Diagnosis of MRSA in the outpatient setting or by positive culture within 48 hours of hospital admission.<br>No history of MRSA infection or colonization.<br>No history in the past year of:<br>(1) Hospitalization<br>(2) Admission to a nursing home, skilled nursing facility, or hospice<br>(3) Dialysis<br>(4) Surgery<br>No permanent indwelling catheters or medical devices that pass through the skin into the body                                                | Not defined                                                                                                                    | Not defined                                                                                                   |
| Herold et al. [3]                              | Isolate from a specimen obtained within 72 hours of hospital admission.<br>No identified risks including:<br>(1) Hospitalization<br>(2) Previous hospitalization or antimicrobial therapy within past 6 months<br>(3) History of endotracheal intubation, underlying chronic disorder, presence of an indwelling venous or urinary catheter, a history of any surgical procedure<br>(4) Notation in the medical record of a household contact with an identified risk factor | Not defined                                                                                                                    | Not defined                                                                                                   |
| Vandenesch et al. [5]                          | Positive culture within 48 hours after hospital admission<br>No risk factors for nosocomial acquisition, including no hospitalizations or nursing home residence in the year before admission                                                                                                                                                                                                                                                                                | Generally susceptible to most of antibiotics tested apart from $\beta$ lactams                                                 | Novel smaller variant of <i>SCCmec</i> (for example <i>SCCmecIV</i> ).<br><i>lukSF-PV</i> gene locus positive |
| O'Brien et al. [10]                            | Isolates from people who have had little or no contact with health care facilities or workers                                                                                                                                                                                                                                                                                                                                                                                | Non multiresistant:<br>Strains resistant to <3 of the following non- $\beta$ lactams:<br>GEN, ERY, TET, TMP, RIF, FA, CIP, MUP | <i>SCCmecIV</i><br>Multiple clones described based on MLST                                                    |

**NOTE.** CIP ciprofloxacin; ERY, erythromycin; FA, fusidic acid; GEN, gentamicin; MLST, multi-locus sequence type; MUP, mupirocin; RIF, rifampin; TET, tetracycline; TMP, trimethoprim.

used interchangeably to describe the source of the infection, the antibiotic phenotype, and the genotype of the organism, resulting in considerable confusion in defining the problem. Community MRSA clones usually cause community-onset infection and are usually non-multidrug resistant. Frequently, they carry *SCCmec* allotypes IV and V and also the *lukSF-PV* genes, which encode Panton-Valentine leukocidin (PVL), a leukotoxin that may be associated with more severe disease presentations [1, 7]. However, there are exceptions to all these rules [8]. Although the Centers for Disease Control and Prevention (CDC) definition of CA-MRSA is the most widely accepted [9], there are varying definitions as to what constitutes community MRSA (Table 1). To add to the potential confusion, the evolving nature of MRSA resistance and epidemiology means that many of the listed definitions can become inaccurate and obsolete. To complicate matters further, a number of different molecular typing methods have been used to identify community MRSA clones, including multilocus sequence typing, pulsed field gel electrophoresis, and *spa* typing [1]. For the purposes of this review, we will avoid the term “CA-MRSA”, but have included clones that are described in the literature as representing community MRSA. We will use multilocus sequence typing

and *SCCmec* typing to describe MRSA clones. For example, ST8-MRSA-IV indicates that a *S. aureus* isolate is MLS type 8, methicillin resistant and contains *SCCmecIV*. This standard nomenclature is unambiguous and allows for comparison of results between laboratories. Other typing nomenclature is included only if there is widespread use of these terms.

## GLOBAL EPIDEMIOLOGY AND EMERGING RESISTANCE

The global epidemiology of community MRSA is remarkably heterogeneous (Figure 1). In some regions, a single clone dominates (eg, USA300 in the United States), whereas in other regions, multiple clones have been identified (eg, there are >100 clones described in Australia). The clinical presentation, known risk factors, and typical non- $\beta$  lactam susceptibility profile are summarized in Table 2 and Figure 2.

## NORTH AMERICA

Community MRSA strains circulating in the USA are pulsed field type USA300 (ST8-MRSA-IV), USA400 (ST1-MRSA-IV),

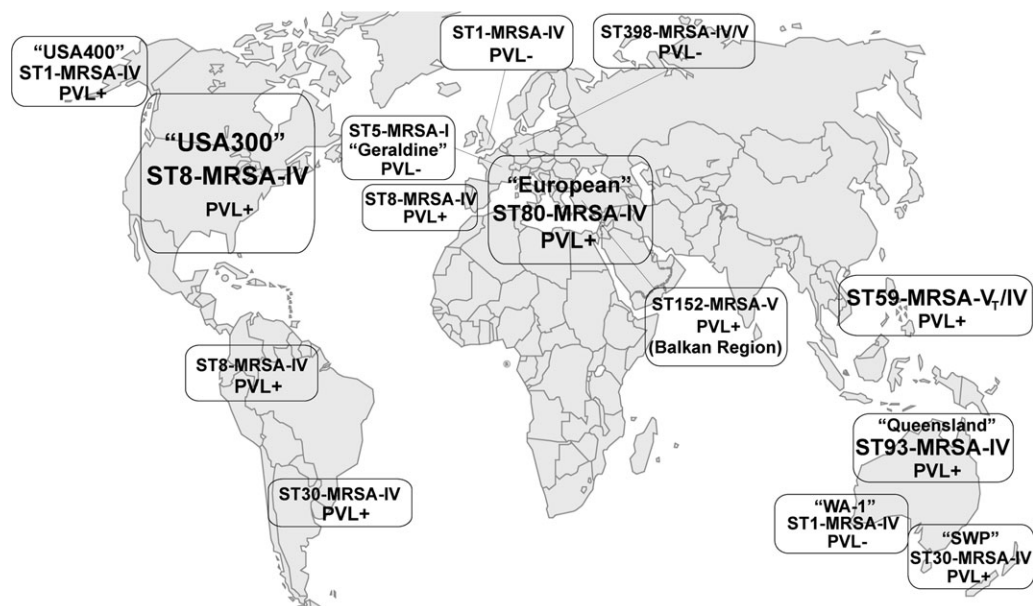

**Figure 1.** Global distribution of dominant community methicillin-resistant *Staphylococcus aureus* (MRSA) clones and Pantone Valentin leukocidin (PVL) status.

USA1000 (ST59-MRSA-IV), and USA1100 (ST30-MRSA-IV) [29]. The dominant clones USA300 and USA400 carry *lukSF-PV*. Community MRSA was first well documented in children in the United States in the late 1990s, with infections caused by USA400 [1, 3, 15]. It is now clear that USA300 has overtaken USA400 as the epidemic clone in most of the United States, except Alaska [14, 30]. The situation in Canada is similar to that in the United States, with USA300 becoming increasingly common [31].

#### Resistance Profile of USA300 and USA400

The usual antibiotic susceptibility profile of USA300 and USA400 is summarized in Table 2. Of all the community MRSA clones, increasing non- $\beta$  lactam resistance has been described predominately in USA300 (Figure 2). The typical antibiotic profile of USA300 is susceptibility to trimethoprim-sulfamethoxazole (TMP-SMX), clindamycin, and tetracycline and resistance to erythromycin and gatifloxacin [13]. The CDC recommends that isolates that test resistant to erythromycin and susceptible to clindamycin be subjected to further testing for inducible clindamycin resistance (ie, the D-test), because there have been reports of clindamycin treatment failures in this context [32]. In USA300 isolates, resistance to erythromycin was almost uniform (92.8%), whereas the clindamycin resistance rate was 6.5% (1.8% inducible) [13].

In the population of men who have sex with men in San Francisco and Boston, multidrug resistance in USA300, mediated by a large conjugative plasmid carrying genes encoding resistance to mupirocin, macrolides, and clindamycin, has been described [33, 34]. These multidrug-resistant isolates may also

harbor another plasmid that confers resistance to tetracycline (resistance rate, 63%) and may also express chromosomally encoded resistance to ciprofloxacin in up to 77% of cases [33]. Although these tetracycline-resistant isolates may appear to be susceptible to doxycycline, resistance to this agent has been induced in vitro [35]. Fortunately, susceptibility to TMP-SMX has been preserved. There has also been increasing clindamycin resistance reported in other populations, including children [36]. In the Active Bacterial Core Surveillance system study of USA300 isolates, a conjugative plasmid carrying the high-level mupirocin resistance gene and genes encoding gentamicin, TMP, and clindamycin resistance was found [12]. Rarely, there have been case reports of patients with deep-seated USA300 infections in which the isolates developed intermediate resistance to vancomycin and nonsusceptibility to daptomycin after treatment with vancomycin [37, 38]. Typically, USA400 is resistant to erythromycin and clindamycin but susceptible to other agents [14].

#### EUROPE

European community MRSA is very heterogenous, and accurate description of MRSA epidemiology is made difficult by the lack of standardized surveillance, clonal diversity, and the high degree of geographical segregation of clones. Fortunately, there is relatively low prevalence of community MRSA in Europe, despite high rates of hospital-associated MRSA in many countries. Countries with the lowest incidence of MRSA infection (eg, northern European countries) are paradoxically those for which data are the most readily available and accurate. However, these data probably cannot be extrapolated to all of Europe.

**Table 2. Summary of Genetic Features, Clinical Profile, and Antimicrobial Susceptibility of Dominant Global Clones of Community Methicillin-Resistant *Staphylococcus aureus* (MRSA)**

| Region        | Dominant MRSA clones       | Frequency                                                                                          | Typical disease pattern                                                                                                 | Risk factors                                                                                                                    | lukSF-PV pos | Typical non-β lactam susceptibility (% susceptible) |        |         |      |             |     |      |     |                                |     | Isolate collection dates and References              |
|---------------|----------------------------|----------------------------------------------------------------------------------------------------|-------------------------------------------------------------------------------------------------------------------------|---------------------------------------------------------------------------------------------------------------------------------|--------------|-----------------------------------------------------|--------|---------|------|-------------|-----|------|-----|--------------------------------|-----|------------------------------------------------------|
|               |                            |                                                                                                    |                                                                                                                         |                                                                                                                                 |              | ERY                                                 | CLI    | TMP/SMX | TET  | FQ          | VAN | RIF  | FA  | AG                             | MUP |                                                      |
| North America | USA300 (ST8-MRSA-IV)       | 97% of MRSA presenting as community SSTI [4]                                                       | SSTI most common. Also reports of bacteremia, necrotizing fasciitis, severe pneumonia including post influenza [6, 11]. | Has spread to the entire population but known risk factors are: sports teams, jailed inmates, military, IVDU, MSM, children [6] | Y            | NA                                                  | 93**   | 99      | 91   | NA          | NA  | NA   | NA  | 99.2 (Gent)                    | 97  | 2005-8 [12]                                          |
|               |                            |                                                                                                    |                                                                                                                         |                                                                                                                                 |              | 1.8                                                 | 93.5** | 99.6    | 91.3 | 57.4 (Gati) | 100 | NA   | NA  | NA                             | NA  | 2004-7 [13]                                          |
|               | USA400 (ST1-MRSA-IV)       | <1% of MRSA SSTI [4]. Still predominant clone in Alaska [14].                                      | SSTI most common. Also reports of fulminant sepsis [15].                                                                | Native American [14]                                                                                                            | Y            | 40                                                  | 42.5** | 100     | NA   | 93.3(Cip)   | 100 | 97.5 | NA  | 95.8 (Gent)                    | NA  | 1996, 2000, 2004-6 [14]                              |
| Europe*       | ST80-MRSA-IV               | <5% (Spain) to 92% (Greece) of MRSA [16]                                                           | SSTI most common. [17]. Also reports of necrotizing pneumonia [18].                                                     | Travel/migration from South Mediterranean countries [19]                                                                        | Y            | 94.6                                                | 95.6#  | NA      | 15.3 | 99.2        | 100 | 99.5 | 7.4 | 15.3(Strep), 9.4 (Kan)         | 100 | 1999-2006 [17]                                       |
|               |                            |                                                                                                    |                                                                                                                         |                                                                                                                                 |              | 69                                                  | NA     | NA      | 22   | 100         | 100 | 100  | <5  | <5 (Kan), >95 (Tob, Gent)      | NA  | F. Laurent, 2008 (unpublished data of >200 isolates) |
|               | ST398-MRSA-IV/V            | 20% of all MRSA in Netherlands [20]                                                                | SSTI most common [20]. Invasive infections uncommon.                                                                    | Close contact with pigs                                                                                                         | N            | 77                                                  | 77#    | 98      | 0    | 98          | 100 | 100  | 100 | 59 (Kan), 57 (Tob), 63 (Gent)  | 100 | [21]                                                 |
|               | ST5-MRSA-I Geraldine clone | 0.54% of all <i>S. aureus</i> and 2.61% of all MRSA in France (F. Laurent, 2008, unpublished data) | SSTI, bacteremia, pneumonia, toxic shock syndrome [18]                                                                  | No data                                                                                                                         | N            | 74                                                  | NA     | NA      | 85   | 99          | 100 | 94   | 1   | 22 (Kan), 78 (Tob), 100 (Gent) | NA  | F. Laurent, 2008 (unpublished data of >100 isolates) |

|           |                                 |                                                                                                                       |                                                                                                     |                                                                                                |                                                           |      |       |                           |            |            |     |      |      |             |      |                   |
|-----------|---------------------------------|-----------------------------------------------------------------------------------------------------------------------|-----------------------------------------------------------------------------------------------------|------------------------------------------------------------------------------------------------|-----------------------------------------------------------|------|-------|---------------------------|------------|------------|-----|------|------|-------------|------|-------------------|
| Asia      | ST59-MRSA-V <sub>T</sub> /IV    | 5.8% of children colonized In Taiwan [22]. 3.2% of adults colonized in Taiwan [23]. ~13% of community onset SAB [24]. | SSTI most common. Also bacteremia, musculoskeletal, bone & joint and lung and CNS involvement [24]. | Children                                                                                       | Yes in SCCmec V <sub>T</sub> and in isolates causing SSTI | 11.6 | 14.3# | 99.3                      | 99.3 (Min) | 100 (Cip)  | 100 | 100  | NA   | 74.1 (Gent) | NA   | 2007 [23]         |
| Australia | ST93-MRSA-IV (Queensland clone) | 19% of all MRSA [25]                                                                                                  | Skin Infection. Also reports of necrotizing pneumonia and deep musculoskeletal infection [26].      | Initially isolated in the white population but has spread to the entire population.            | Y                                                         | 90.7 | NA    | NA(-data from 2006 100-%) | 99.3       | 100(Cip)   | NA  | 100  | 100  | 100(Gent)   | 100  | 2008 [25, 27, 28] |
|           | ST1-MRSA-IV (WA-1 clone)        | 13% of all MRSA [25]                                                                                                  | Skin Infection                                                                                      | Initially isolated in the Aboriginal population but has spread to the entire population.       | N                                                         | 77.9 | NA    | NA (data from 2006 100-%) | 98.4       | 95.2 (Cip) | NA  | 96.8 | 71.4 | 98.4 (Gent) | 98.4 | 2008 [25, 27, 28] |
|           | ST30-MRSA-IV (SWP clone)        | 7% of all MRSA [25]                                                                                                   | Skin InfectionAlso reports of bone and joint infection [26]                                         | Initially isolated in the Pacific Islander population but has spread to the entire population. | Y                                                         | 95.7 | NA    | NA (data from 2006 100-%) | 100        | 97.9 (Cip) | NA  | 100  | 100  | 100 (Gent)  | 100  | 2008 [25, 27, 28] |

**NOTE.** AG, aminoglycoside; Cip, ciprofloxacin; CLI, clindamycin; ERY, erythromycin; FQ, fluoroquinolone; FA, fusidic acid; Gati, gatifloxacin; Gent, gentamicin; Kan, kanamycin; Min, minocycline; MUP, mupirocin; NA, not available in referenced study; pos, positive; RIF, rifampicin; Strep, streptomycin; TET, tetracycline; TMP-SMX, trimethoprim-sulfamethoxazole; Tob, tobramycin; VAN, vancomycin. . \*For ST8-MRSA-IV (USA300) see North America and for ST1-MRSA-IV (WA-1 clone) see Australia. \*\* Inducible clindamycin resistance testing was performed. #No inducible clindamycin resistance testing performed.

Overall, the predominant clone in Europe is the *lukSF-PV*-positive European ST80-MRSA-IV clone. However, USA300 (ST8-MRSA-IV) has also been reported throughout the United Kingdom and Europe. In addition to this, there are 4 other significant clones: in northern Europe (the Netherlands, Germany, and Denmark), pig-associated ST398-MRSA-IV/V has been reported; in the United Kingdom, Australian WA-1 (ST1-MRSA-IV) is prevalent in some populations (intravenous drug users and homeless persons) [19, 39]; and in France, ST5-MRSA-I (Geraldine clone) has been reported. In addition, a *lukSF-PV*-positive ST152-MRSA-V clone has sporadically been reported in a number of countries [40–42]. Some of the patients infected with this strain had ties to Balkan countries, which may indicate its origins. There are many other clones described, but these are geographically limited and currently not highly prevalent.

#### ST80-MRSA-IV

ST80-MRSA-IV emerged in the late 1990s [43] and has been detected in the majority of European countries. In northern Europe, the clone has been implicated in a high proportion of MRSA infections, although overall prevalence of MRSA infection is low in this region [17, 19]. Conversely, in Greece, where the prevalence of MRSA infection is very high, up to 92% of all community-acquired staphylococcal infections and 24% of hospital-associated MRSA infections are due to ST80 [16, 44–46]. Of interest, many patients infected with the ST80 clone have epidemiological links to countries south of the Mediterranean (Algeria, Tunisia, Egypt, and Lebanon), indicating that ST80 may have originated from this region [19]. This clone is typically resistant to tetracycline and may demonstrate intermediate susceptibility or resistance to fusidic acid [17, 18, 44, 47]. Fluoroquinolone resistance was rare (0.8%) in Danish isolates but may be variable elsewhere [17]. There are no definitive data available on emergence of resistance to non- $\beta$  lactams. At a single center in Algeria, 40% of ST80 hospital-associated MRSA infections were fluoroquinolone resistant, whereas resistance was absent in community strains of ST80 MRSA [48].

#### ST398-MRSA-IV/V

First described in France, the pig-associated clone ST398-MRSA-IV/V has recently emerged as a human public health problem, especially in northern Europe [49]. The clone accounts for 20% of all MRSA isolates in the Netherlands, and many other European countries have also reported sporadic isolates [19, 20, 50, 51]. The ST398 clone has been described in Canada and the United States [52, 53]. Although ST398 colonization and transmission has been reported primarily in animals, persons with occupational exposure to livestock are at higher risk of carriage, compare with the general population [50]; human-to-human transmission has been described elsewhere [20, 51]. In

addition to uniform tetracycline resistance, various resistance phenotypes were reported among subsets of isolates from pigs, including resistance to erythromycin, clindamycin, TMP, chloramphenicol, and aminoglycosides. Of note, there is almost uniform susceptibility to fluoroquinolones, fusidic acid, and mupirocin [21, 54]. Recently, a multidrug-resistant plasmid containing genes encoding resistance to streptogramin A, lincosamides, pleuromutilins, kanamycin-neomycin, tetracyclines, and TMP was described in a pig ST398 isolate [54].

#### ST5-MRSA-I

An atypical TSST-1 positive MRSA clone, the Geraldine ST5-MRSA-I clone, is now the most prevalent community MRSA clone in France [55] (F. Laurent, personal communication). The clone causes community-onset and hospital-acquired infections [18, 56]. All isolates are susceptible to fluoroquinolones, lincomycin, and gentamicin and are nonsusceptible to fusidic acid [18, 55]. Resistance to kanamycin, tobramycin, and erythromycin is variable.

### ASIA

Only limited data are available on community MRSA epidemiology in Asia. In Taiwan, ST59-MRSA-V<sub>T</sub>/IV is the predominant clone [23, 57]. Up to 7.3% of Taiwanese children are colonized with MRSA, and >80% of the colonizing clones are ST59 [22]. This clone is typically resistant to erythromycin, clindamycin, and occasionally, gentamicin but is susceptible to TMP-SMX, tetracyclines, and fluoroquinolones [23]. In Hong Kong, the predominant community MRSA clones are ST30-MRSA-IV and ST59-MRSA-IV/V that carry *lukSF-PV*, whereas in Singapore, the predominant clone is ST30-MRSA-IV [58, 59]. In contrast, in a community study involving children in Japanese day-care centers and kindergartens, 4.3% of participants were found to be colonized with MRSA; the majority of the colonizing clones were ST78-MRSA-IV and ST91-MRSA-IIb/IV [60].

### SOUTH AMERICA

A paucity of data is available from South America. In a study conducted in Colombia, Ecuador, Peru, and Venezuela, there were significant differences in the rates of MRSA recovery among health care centers [61]. Of note, 81% of community MRSA isolates were ST8-MRSA-IV. In Uruguay, there was a large outbreak of *lukSF-PV*-positive ST30-MRSA-IV infection in jails and the community [62]. A subsequent report confirmed that ST30 is the predominant circulating strain in Uruguay [63].

### AUSTRALIA AND OCEANIA

The first report of community MRSA infection in Australia and Oceania was due to isolates from the remote Kimberley region of

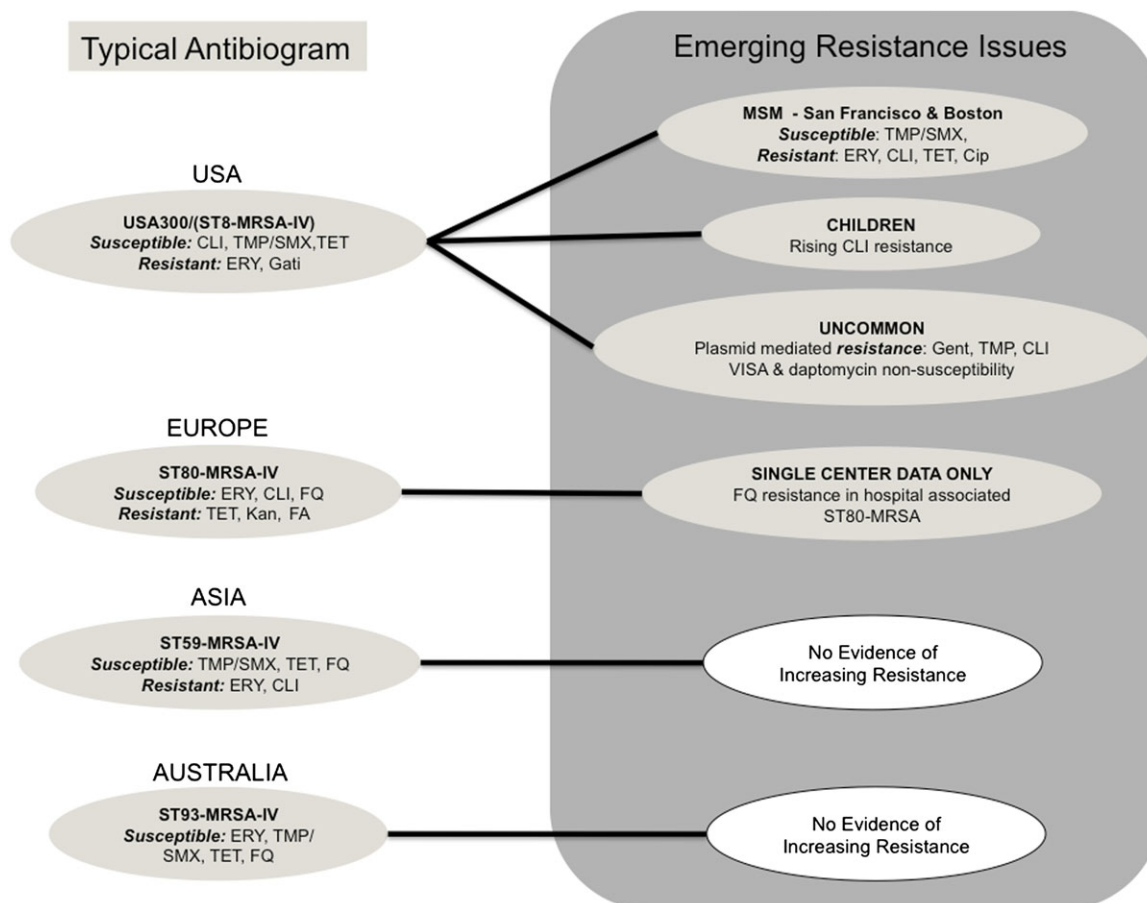

**Figure 2.** Summary of typical antimicrobial resistance profile of dominant global clones of community methicillin-resistant *Staphylococcus aureus* (MRSA) and emerging resistance issues. CLI, clindamycin; ERY, erythromycin; FA, fusidic acid; FQ, fluoroquinolone; Gati, gatifloxacin; Gen, gentamicin; Kan, kanamycin; MSM, men who have sex with men; TET, tetracycline; TMP-SMX, trimethoprim-sulfamethoxazole; VISA, vancomycin-intermediate *S. aureus*

Western Australia (*lukSF-PV*-negative ST8-MRSA-IV) [2]. The most frequent clone in this region is currently ST1-MRSA-IV (WA-1), which is also generally *lukSF-PV* negative [64]. Rates of colonization and infection with MRSA in remote Australian Aboriginal communities are very high [65], and recently, a novel clone, ST75-MRSA-IV, was found to predominate in this population in northern Australia [66]. In the late 1990s, MRSA skin infections caused by the South West Pacific (SWP, ST30-MRSA-IV, *lukSF-PV* positive) strain were observed in eastern Australia [64]. This is also the dominant clone in New Zealand [67]. Subsequently, a unique Australian clone was described (Queensland clone, ST93-MRSA-IV, *lukSF-PV* positive) [64]. The 3 major Australian clones have spread across the continent, and ST93-MRSA-IV is now the most prevalent Australian clone (Figure 1) [25]. Biennial surveys from the Australian Group on Antimicrobial Resistance have revealed an increase in the prevalence of community MRSA from 4.7% (in 2000) to 11.1% (in 2006), as a proportion of community *S. aureus* infections [25, 27, 68]. ST93-MRSA-IV is typically uniformly susceptible to non- $\beta$  lactams [25, 28]. Susceptibility patterns for ST1-MRSA-

IV and ST30-MRSA-IV are shown in Table 2. Comparison of isolates from the 2000 and 2008 Australian Group on Antimicrobial Resistance surveys revealed no significant increase in antimicrobial resistance.

## TREATMENT OF COMMUNITY MRSA INFECTION

### Skin and Soft-Tissue Infection (SSTI)

Empirical antibiotic treatment should be guided by local antimicrobial resistance patterns, when possible, and specimens should be obtained for culture and susceptibility testing. A proposed treatment algorithm is shown in Figure 3. Some authorities have suggested that a change in empirical antibiotic therapy is warranted after the prevalence of community MRSA infection exceeds 10%–15%, although there are no specific data to support this figure [69]. Many focal MRSA SSTIs in the immunocompetent host will be adequately treated with incision and drainage alone, and this is encouraged [70]. The role of antibiotic therapy in addition to

incision and drainage is controversial [71, 72]. In 2 randomized controlled studies comparing TMP-SMX with placebo, there was no difference in failure rates between the 2 treatment arms [73, 74]. TMP-SMX may decrease the risk of development of new lesions in the short term; however, the significance of this is unclear. In the context of severe disease, rapid progression, signs of systemic illness, and significant comorbidities or when incision and drainage is not possible or ineffective, systemic antimicrobial therapy should be used [32].

There have been no large randomized studies comparing frequently used oral agents for community MRSA [7]. Observational studies have reported good outcomes with clindamycin

[3, 75], TMP-SMX [76], and doxycycline-minocycline [77, 78] for treatment of SSTI. Although combination antibiotic therapy has been recommended by some authorities [79], it may incur additive adverse drug reactions, and we do not recommend combination therapy for skin infection. In addition, topical fusidic acid and mupirocin therapy should be avoided because of the risk of inducing resistance [80, 81]. Linezolid is not generally recommended for the treatment of uncomplicated SSTI because of potential toxicity and high cost.

### Invasive Infections

For severe community MRSA infection, vancomycin remains the treatment of choice [7, 82]. Although there are some

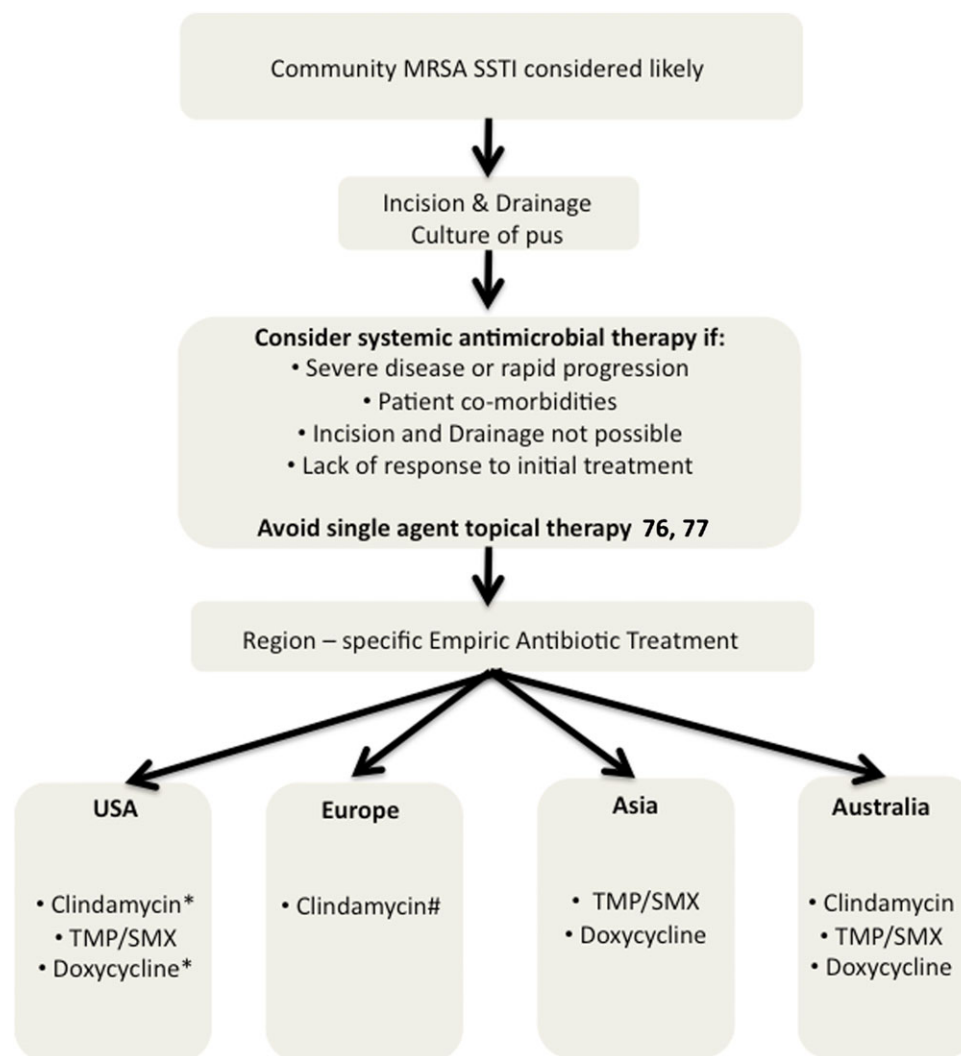

**Figure 3.** Treatment algorithm for empirical therapy of skin and soft-tissue infections (SSTIs) potentially caused by community methicillin-resistant *Staphylococcus aureus* (MRSA). For severe invasive disease potentially caused by community MRSA. MSM, men who have sex with men; TMP-SMX, trimethoprim-sulfamethoxazole. \*Consider use of alternative agent in MSM population in San Francisco & Boston [34]. #Possible alternative agents to clindamycin include rifampicin and fusidic acid. These agents should not be used as single agents because of the risk of development of resistance. However, combination therapy may incur additive adverse drug reactions. Whether antibiotic therapy is necessary for uncomplicated skin infection should therefore be considered.



**Table 3. Summary of Randomized Controlled Trials of Vancomycin versus Linezolid, Daptomycin, or Tigecycline for the Treatment of Severe Staphylococcal Infection in Adults<sup>a</sup>**

| Comparator  | Disease                                                                               | Study Type                                                                                  | Number of Patients | Outcomes                                                                                                                                              | Proportion MRSA                           | Comment                                                                                                                                                                                                                                                                                                | Reference |
|-------------|---------------------------------------------------------------------------------------|---------------------------------------------------------------------------------------------|--------------------|-------------------------------------------------------------------------------------------------------------------------------------------------------|-------------------------------------------|--------------------------------------------------------------------------------------------------------------------------------------------------------------------------------------------------------------------------------------------------------------------------------------------------------|-----------|
| Linezolid   | Nosocomial Pneumonia                                                                  | Randomized, Double Blind                                                                    | 203                | Equivalence                                                                                                                                           |                                           | Results of MRSA infected patients subsequently combined with Wunderink <i>et al</i> 2003 [83]. Posthoc analysis of 160/1019 MRSA patients - mortality benefit and better clinical cure rate with linezolid compared to vancomycin. The validity of the post-hoc analysis has been questioned [84, 85]. | [86, 87]  |
|             | Nosocomial Pneumonia                                                                  | Randomized, Double Blind                                                                    | 623                | Equivalence                                                                                                                                           |                                           | See above                                                                                                                                                                                                                                                                                              | [83, 87]  |
|             | Hospitalized patients (skin infection, pneumonia, urinary tract infection)            | Randomized, Open Labeled                                                                    | 460                | Equivalent                                                                                                                                            | 53% <i>S. aureus</i> . Of these, 93% MRSA |                                                                                                                                                                                                                                                                                                        | [88]      |
|             | Febrile Neutropenia                                                                   | Randomized, Double Blind                                                                    | 488                | Equivalence                                                                                                                                           | 1.5% MRSA                                 |                                                                                                                                                                                                                                                                                                        | [89]      |
|             | Nosocomial pneumonia, skin infection, septicemia                                      | Randomized, Open Labeled                                                                    | 151                | No difference in clinical success rates. End of treatment microbiological eradication rates higher in linezolid group but no difference at follow up. | 69% MRSA                                  |                                                                                                                                                                                                                                                                                                        | [90]      |
|             | Ventilator associated pneumonia                                                       | Randomized, Open Labeled                                                                    | 149                | No statistically significant difference                                                                                                               | 34% MRSA                                  |                                                                                                                                                                                                                                                                                                        | [91]      |
| Daptomycin  | Catheter related blood stream infection and skin infection                            | Randomized, Open Labeled                                                                    | 726                | Linezolid non inferior                                                                                                                                | 12% MRSA                                  |                                                                                                                                                                                                                                                                                                        | [92]      |
|             | <i>S. aureus</i> Septicemia and Endocarditis                                          | Randomized, Open Labeled                                                                    | 235                | Daptomycin non inferior                                                                                                                               | 38%                                       | Subgroup analysis of MRSA infected patients – suggestion of better outcomes with daptomycin treated patients                                                                                                                                                                                           | [93, 94]  |
| Tigecycline | Hospitalized patients with MRSA and VRE (skin infection and intraabdominal infection) | Randomized, Double Blind                                                                    | 156 (MRSA group)   | Not powered for statistical comparison between groups but cure rates similar                                                                          | 100% of MRSA group                        |                                                                                                                                                                                                                                                                                                        | [95]      |
|             | Secondary Bacteremia                                                                  | Pooled results from 7 Randomized Double Blind trial and 1 open labeled noncomparative trial | 170                | No significant difference between treatment groups                                                                                                    | 5.9%                                      | Post-hoc pooled results from 8 different studies with heterogenous design. Hence, comparator agent against tigecycline were varied but the comparator was vancomycin for the 10 patients with MRSA                                                                                                     | [96]      |

<sup>a</sup> Studies which are primarily skin infection studies have been excluded

**Table 4. Community Methicillin-Resistant *Staphylococcus aureus* (MRSA) Decolonization Studies**

| Reference             | Study Goal           | Study Type    | No. Participants | Study Site             | MRSA Clone                  | Regimen                                                                                                                                                                                                                                                                                                                                                                                                                 | Outcome                                                                      |
|-----------------------|----------------------|---------------|------------------|------------------------|-----------------------------|-------------------------------------------------------------------------------------------------------------------------------------------------------------------------------------------------------------------------------------------------------------------------------------------------------------------------------------------------------------------------------------------------------------------------|------------------------------------------------------------------------------|
| Bartels et al. [108]  | Outbreak termination | Observational | 23               | Community, Denmark     | ST30-MRSA-IV                | Standard therapy: whole-body wash and hair wash in 4% chlorhexidine once daily, combined with mupirocin nasal intment 2% three times daily for 5 days. If ineffective, chlorhexidine washing was prolonged to 10 days, combined with a 5 day regime of mupirocin. Some throat carriers received rifampicin plus fusidic acid or clindamycin alone or clindamycin plus fusidic acid or clarithromycin plus fusidic acid. | Colonization eradicated in all patients. No skin infections occurred.        |
| Campbell et al. [109] | Outbreak termination | Observational | 206              | Military camp, USA     | ST8 MRSA, lukSF-PV positive | Nasal mupirocin and body wash with an antimicrobial skin cleanser on three separate occasions. Barracks routinely disinfected with 5% bleach.                                                                                                                                                                                                                                                                           | Termination of outbreak                                                      |
| Longtin et al. [110]  | Outbreak termination | Observational | 45               | Community, Switzerland | Multiple clones             | Twice-daily nasal mupirocin and daily 4% chlorhexidine showers for 10 days. Frequent linen changes and the use of dedicated personal hygiene products                                                                                                                                                                                                                                                                   | 39/45 No clinical relapse and no MRSA isolated. 6/45 remained MRSA positive. |

|                     |                      |               |                            |                    |                              |                                                                                                                                                                                                                                                                                                                                                                                                                                                                                               |                                                                                                                                            |
|---------------------|----------------------|---------------|----------------------------|--------------------|------------------------------|-----------------------------------------------------------------------------------------------------------------------------------------------------------------------------------------------------------------------------------------------------------------------------------------------------------------------------------------------------------------------------------------------------------------------------------------------------------------------------------------------|--------------------------------------------------------------------------------------------------------------------------------------------|
| Urth et al. [111]   | Outbreak termination | Observational | 79(26 households)          | Community, Denmark | ST80-MRSA-IV                 | <p>From 1997-1999: Daily body and hair wash with 4% chlorhexidine and twice daily nasal 1% chlorhexidine gel for 21 days. Daily change of towels and clothes, a laundry temperature above 90°C, and extensive cleaning of the home. This regimen was not successful.</p> <p>From 2000: Daily shower using the chlorhexidine detergent and nasal 2% mupirocin for 5 days. Daily changing of towels, regular cleaning of the house, and changing of clothes and bed linens on days 1 and 5.</p> | 20/26 households compliant with regimen. Decolonization successful in 19/20 compliant households.                                          |
| Romano et al. [112] | Outbreak termination | Observational | 107 each year, for 3 years | Football team      | Not stated but likely USA300 | <p>All infected cases received incision and drainage, and antibiotic therapy (doxycycline and rifampicin). All MRSA nasal carriers received topical mupirocin and oral rifampicin for 10 days. Hexachlorophene body wash. Extensive environmental decontamination including increasing laundering water temperatures to 60°C, disinfection of surfaces and use of disposable towels. Education of staff</p>                                                                                   | Termination of outbreak. Carriers subjected to decolonization procedures were demonstrated to have eradication of colonization at 4 weeks. |

|                       |                                                                                                     |                                                      |     |  |                    |            |                                                                                                               |                                                                                                                                                                                                                      |
|-----------------------|-----------------------------------------------------------------------------------------------------|------------------------------------------------------|-----|--|--------------------|------------|---------------------------------------------------------------------------------------------------------------|----------------------------------------------------------------------------------------------------------------------------------------------------------------------------------------------------------------------|
|                       |                                                                                                     |                                                      |     |  |                    |            | and players including use of alcohol-based sanitizers, covering of open wounds, restriction of whirlpool use. |                                                                                                                                                                                                                      |
| Nguyen et al. [113]   | Outbreak termination                                                                                | Observational                                        | 107 |  | Football team      | USA300     | Hexachlorophene body wash. Single use towels.                                                                 | Termination of outbreak.                                                                                                                                                                                             |
| Ellis et al. [105]    | Prevention of first SSTI and new colonization and infection in close contacts who were non-carriers | Cluster randomized, double-blind, placebo-controlled | 134 |  | Military camp, USA | USA300     | Investigator administered nasal 2% mupirocin or placebo twice daily for 5 days.                               | 7.7% placebo group developed infections vs. 10.6% mupirocin group (difference not statistically significant). MRSA decolonization did not prevent new colonization. No mupirocin resistance was found in this study. |
| Rahimian et al. [114] | Prevention of recurrent SSTIs                                                                       | Retrospective                                        | 19  |  | Single center, USA | Not stated | Nasal mupirocin – mean duration 9.5 days                                                                      | No difference in recurrent infections                                                                                                                                                                                |

concerns regarding the efficacy of this agent, none of the newer US Food and Drug Administration–approved anti-staphylococcal antibiotics have been shown to be clearly superior to vancomycin in randomized controlled trials of severe staphylococcal disease (Table 3) [82]. A community MRSA prevalence threshold as low as 5%–10% may be appropriate for use of empirical vancomycin therapy in severe, life-threatening infections. Some authorities have recommended the administration of an exotoxin-reducing agent for severe MRSA infections for which *lukSF-PV* is detected (eg, necrotizing pneumonia) [79]. In vitro studies have shown that linezolid, clindamycin, rifampicin, and fusidic acid suppress exotoxin production [97, 98]. However, there are no data to support the use of vancomycin in combination with these antibiotics [99]. There have been some reports of adjunctive intravenous gammaglobulin use for the treatment of severe *lukSF-PV*–positive community MRSA infection; the rationale for this is that anti-PVL antibodies in intravenous gammaglobulin may protect against cytotoxic effects of PVL [100, 101]. However, the role of adjunctive intravenous gammaglobulin therefore remains unclear [102].

## DECOLONIZATION AND ERADICATION OF COMMUNITY MRSA

Although intranasal mupirocin therapy significantly reduces the rate of postoperative *S. aureus* infection among surgical patients who are *S. aureus* carriers [103, 104], some authors have criticized the recommendation to eradicate community MRSA carriage, because it has been largely extrapolated from the hospital-associated *S. aureus* experience [30]. Furthermore, there is concern that indiscriminate use of mupirocin will lead to increased resistance [81]. Although mupirocin resistance associated with short-term use of mupirocin is rare [105], the use of mupirocin may select for mupirocin resistance conferred by large conjugative plasmids in USA300 [12]. These plasmids also carry *ermC*, which encodes resistance to macrolides, lincosamides, and streptogramins [34] and genes that encode resistance to TMP and gentamicin [12, 106]. Resistance to triclosan and chlorhexidine has not yet been reported in community MRSA isolates [107].

The reports of decolonization in community MRSA are heterogeneous and inconclusive in their findings. In these case reports, the goal of decolonization is usually to terminate an outbreak, and interventions may include topical mupirocin; body washes with topical antiseptics, such as triclosan and chlorhexidine; extensive environmental decontamination; and in some contexts, systemic antibiotics. A standardized definition of success is lacking in the literature. A summary of some of these studies is included in Table 4. In terms of nasal mupirocin decolonization for the purpose of prevention of first-time SSTIs

in community MRSA–colonized individuals (USA300) and for the prevention of new colonization and/or infection in close contacts who are noncarriers, the findings from a randomized clinical trial showed no benefit from mupirocin [105]. USA300 significantly colonizes nonnasal sites, such as the inguinal region, and this may explain the lack of efficacy of a decolonization regimen consisting of only nasal mupirocin [115]. This predilection for nonnasal sites may not be shared by other community MRSA clones, because it is thought that the arginine catabolic mobile element or ACME element contributes to skin colonization, and this is generally not present in other community MRSA clones. There are no prospective studies assessing the use of decolonization for the prevention of recurrent SSTIs. Therefore, it is not currently clear how and when community MRSA decolonization should be attempted.

## CONCLUSION

The global epidemiology of community MRSA is very heterogeneous, with important geographical differences in the predominant clones and the overall frequency with which these clones are isolated. The most common clinical syndrome for all community MRSA remains SSTI, although more invasive disease has been described. The acquisition of additional antimicrobial resistance by ST8-MRSA-IV (USA300) provides a warning for other regions where other clones predominate. Accurate drug resistance surveillance is crucial to recognize emerging resistance trends and to guide empirical antibiotic selection.

## Acknowledgments

**Financial support.** This work was supported by the National Health and Medical Research Council, Australia, and the Austin Hospital Medical Research Foundation (to K.C. and B.P.H.) and the CSL Fellowship from the Royal Australasian College of Physicians (to B.P.H.).

**Potential conflicts of interest.** Dr Howden has been a daptomycin advisory board member for Novartis, Australia. All other authors: no conflicts.

## References

1. Chambers HF, Deleo F. Waves of resistance: *Staphylococcus aureus* in the antibiotic era. *Nat Rev Microbiol* **2009**; 7:629–641.
2. Udo EE, Pearman JW, Grubb WB. Genetic analysis of community isolates of methicillin-resistant *Staphylococcus aureus* in Western Australia. *J Hosp Infect* **1993**; 25:97–108.
3. Herold BC, Immergluck LC, Maranan MC, et al. Community-acquired methicillin-resistant *Staphylococcus aureus* in children with no identified predisposing risk. *JAMA* **1998**; 279:593–598.
4. Moran GJ, Krishnadasan A, Gorwitz RJ, et al. Methicillin-resistant *S. aureus* infections among patients in the emergency department. *N Engl J Med* **2006**; 355:666–674.
5. Vandenesch F, Naimi T, Enright MC, et al. Community-acquired methicillin-resistant *Staphylococcus aureus* carrying Panton-Valentine leukocidin genes: worldwide emergence. *Emerg Infect Dis* **2003**; 9:978–984.

6. Tenover FC, Goering RV. Methicillin-resistant *Staphylococcus aureus* strain USA300: origin and epidemiology. *J Antimicrob Chemother* **2009**; 64:441–446.
7. Deleo FR, Otto M, Kreiswirth BN, Chambers HF. Community-associated methicillin-resistant *Staphylococcus aureus*. *Lancet* **2010**; 375:1557–1568.
8. Ellington MJ, Ganner M, Warner M, Cookson BD, Kearns AM. Polyclonal multiply antibiotic-resistant methicillin-resistant *Staphylococcus aureus* with Panton-Valentine leukocidin in England. *J Antimicrob Chemother* **2010**; 65:46–50.
9. Centers for Disease Control and Prevention. Community-associated MRSA information for clinicians Available at: [http://www.cdc.gov/ncidod/dhqp/ar\\_mrsa\\_ca\\_clinicians.html](http://www.cdc.gov/ncidod/dhqp/ar_mrsa_ca_clinicians.html). Accessed 26 April 2010.
10. O'Brien FG, Lim TT, Chong FN, et al. Diversity among community isolates of methicillin-resistant *Staphylococcus aureus* in Australia. *J Clin Microbiol* **2004**; 42:3185–3190.
11. Hidron AI, Low CE, Honig EG, Blumberg HM. Emergence of community-acquired methicillin-resistant *Staphylococcus aureus* strain USA300 as a cause of necrotising community-onset pneumonia. *Lancet Infect Dis* **2009**; 9:384–392.
12. McDougal LK, Fosheim GE, Patel JB, the ABCs Team. Emergence of resistance among USA300 MRSA isolates causing invasive disease in the U.S. [abstract C1-166]. In: Program and abstracts of the 48th Interscience Conference on Antimicrobial Agents and Chemotherapy (Washington). Washington, DC: American Society for Microbiology, 2008.
13. Mendes RE, Sader HS, Deshpande LM, Diep BA, Chambers HF, Jones RN. Characterization of baseline methicillin-resistant *Staphylococcus aureus* isolates recovered from phase IV clinical trial for linezolid. *J Clin Microbiol* **2010**; 48:568–574.
14. David MZ, Rudolph KM, Hennessy TW, Boyle-Vavra S, Daum R. Molecular epidemiology of methicillin-resistant *Staphylococcus aureus*, rural southwestern Alaska. *Emerg Infect Dis* **2008**; 14:1693–1699.
15. Centers for Disease Control and Prevention. Four pediatric deaths from community-acquired methicillin-resistant *Staphylococcus aureus* — Minnesota and North Dakota, 1997–1999. *MMWR Morb Mortal Wkly Rep* **1999**; 48:707–710.
16. Chini V, Petinaki E, Meugnier H, et al. Emergence of a new clone carrying Panton-Valentine leukocidin genes and staphylococcal cassette chromosome mec type V among methicillin-resistant *Staphylococcus aureus* in Greece. *Scand J Infect Dis* **2008**; 40:368–372.
17. Larsen AR, Stegger M, Bocher S, Sorum M, Monnet DL, Skov RL. Emergence characterization of community-associated methicillin-resistant *Staphylococcus aureus* infections in Denmark, 1999 to 2006. *J Clin Microbiol* **2009**; 47:73–78.
18. Dauwalder O, Lina G, Durand G, et al. Epidemiology of invasive methicillin-resistant *Staphylococcus aureus* clones collected in France in 2006–2007. *J Clin Microbiol* **2008**; 46:3454–3458.
19. Otter JA, French GL. Molecular epidemiology of community-associated methicillin-resistant *Staphylococcus aureus* in Europe. *Lancet Infect Dis* **2010**; 10:227–239.
20. van Loo I, Huijsdens X, Tiemersma E, et al. Emergence of methicillin-resistant *Staphylococcus aureus* of animal origin in humans. *Emerg Infect Dis* **2007**; 13:1834–1839.
21. de Neeling AJ, van den Broek MJ, Spalburg EC, et al. High prevalence of methicillin resistant *Staphylococcus aureus* in pigs. *Vet Microbiol* **2007**; 122:366–372.
22. Huang YC, Hwang KP, Chen PY, Chen CJ, Lin TY. Prevalence of methicillin-resistant *Staphylococcus aureus* nasal colonization among Taiwanese children in 2005 and 2006. *J Clin Microbiol* **2007**; 45:3992–3995.
23. Wang J, Liao C, Fang C, et al. Prevalence of and risk factors for colonization by methicillin-resistant *Staphylococcus aureus* among adults in community settings in Taiwan. *J Clin Microbiol* **2009**; 47:2957–2963.
24. Wang JL, Chen SY, Wang JT, et al. Comparison of both clinical features and mortality risk associated with bacteremia due to community-acquired methicillin-resistant *Staphylococcus aureus* and methicillin-susceptible *S. aureus*. *Clin Infect Dis* **2008**; 46:799–806.
25. Coombs GW, Nimmo GR, Pearson JC, et al. Prevalence of MRSA strains among *Staphylococcus aureus* isolated from outpatients, 2006. *Commun Dis Intell* **2009**; 33:10–20.
26. Peleg AY, Munchhof WJ, Kleinschmidt SL, Stephens AJ, Huygens F. Life-threatening community-acquired methicillin-resistant *Staphylococcus aureus* infection in Australia. *Eur J Clin Microbiol Infect Dis* **2005**; 24:384–387.
27. Coombs GW, Pearson JC, Christiansen KJ, Nimmo GR. Australian Group for Antimicrobial Resistance. *Staphylococcus aureus* programme 2008 (SAP 2008) community survey MRSA epidemiology and typing report. Available at: <http://www.antimicrobial-resistance.com>. Accessed 2 May 2010.
28. Nimmo GR, Pearson JC, Coombs GW, et al. *Staphylococcus aureus* programme 2008 (SAP 2008) community survey antimicrobial susceptibility report. Available at: <http://www.antimicrobial-resistance.com>. Accessed 8 May 2010.
29. Klevens RM, Morrison MA, Nadle J, et al. Invasive methicillin-resistant *Staphylococcus aureus* infections in the United States. *JAMA* **2007**; 298:1763–1771.
30. Miller LG, Diep BA. Clinical practice: Colonization, fomites, virulence: Rethinking the pathogenesis of community-associated methicillin-resistant *Staphylococcus aureus* infection. *Clin Infect Dis* **2008**; 46:752–760.
31. Simor AE, Gilbert NL, Gravel D, et al. Methicillin-resistant *Staphylococcus aureus* colonization or infection in Canada Surveillance and Changing Epidemiology, 1995–2007. *Infect Control Hosp Epidemiol* **2010**; 31:348–356.
32. Gorwitz RJ, Jernigan DB, Powers JH, Jernigan JA, and Participants in the CDC- Convened Experts' Meeting on Management of MRSA in the Community. Strategies for clinical management of MRSA in the community: summary of an experts' meeting convened by the Centers for Disease Control and Prevention. 2006. Available at: [http://www.cdc.gov/ncidod/dhqp/ar\\_mrsa\\_ca.html](http://www.cdc.gov/ncidod/dhqp/ar_mrsa_ca.html) Accessed 26 April 2010.
33. Diep BA, Chambers HF, Graber CJ, et al. Emergence of multidrug-resistant, community-associated, methicillin-resistant *Staphylococcus aureus* clone USA300 in men who have sex with men. *Ann Intern Med* **2008**; 148:249–257.
34. Diep BA, Gill SR, Chang RF, et al. Complete genome sequence of USA300, an epidemic clone of community-acquired methicillin-resistant *Staphylococcus aureus*. *Lancet* **2006**; 367:731–739.
35. Schwartz BS, Graber CJ, Diep BA, Basuino L, Perdreau-Remington F, Chambers HF. Doxycycline, not minocycline, induces its own resistance in multidrug-resistant, community-associated methicillin-resistant *Staphylococcus aureus* clone USA300. *Clin Infect Dis* **2009**; 48:1483–1484.
36. Braun L, Craft D, Williams R, Tuamokumu F, Ottolini M. Increasing clindamycin resistance among methicillin-resistant *Staphylococcus aureus* in 57 northeast United States military treatment facilities. *Pediatr Infect Dis J* **2005**; 24:622–626.
37. Graber CJ, Wong MK, Carleton HA, Perdreau-Remington F, Haller BL, Chambers HF. Intermediate vancomycin susceptibility in a community-associated MRSA clone. *Emerg Infect Dis* **2007**; 13:491–493.
38. Hageman JC, Patel J, Franklin P, et al. Occurrence of a USA300 vancomycin-intermediate *Staphylococcus aureus*. *Diagn Microbiol Infect Dis* **2008**; 62:440–442.
39. Otter JA, French GL. The emergence of community-associated methicillin-resistant *Staphylococcus aureus* at a London teaching hospital, 2000–2006. *Clin Microbiol Infect* **2008**; 14:670–676.
40. Berglund C, Molling P, Sjöberg L, Söderquist B. Multilocus sequence typing of methicillin-resistant *Staphylococcus aureus* from an area of low endemicity by real-time PCR. *J Clin Microbiol* **2005**; 43:4448–4454.
41. Monecke S, Berger-Bachi B, Coombs G, et al. Comparative genomics and DNA array-based genotyping of pandemic *Staphylococcus aureus* strains encoding Panton-Valentine leukocidin. *Clin Microbiol Infect* **2007**; 13:236–249.

42. Francois P, Harbarth S, Huyghe A, et al. Methicillin-resistant *Staphylococcus aureus*, Geneva, Switzerland, 1993-2005. *Emerg Infect Dis* **2008**; 14:304-307.
43. Tristan A, Bes M, Meugnier H, et al. Global distribution of Pantone-Valentine leukocidin-positive methicillin-resistant *Staphylococcus aureus*, 2006. *Emerg Infect Dis* **2007**; 13:594-600.
44. Chini V, Petinaki E, Foka A, Paratiras S, Dimitracopoulos G, Spiliopoulou I. Spread of *Staphylococcus aureus* clinical isolates carrying Pantone-Valentine leukocidin genes during a 3-year period in Greece. *Clin Microbiol Infect* **2006**; 12:29-34.
45. Niniou I, Vourli S, Lebesi E, et al. Clinical and molecular epidemiology of community-acquired, methicillin-resistant *Staphylococcus aureus* infections in children in central Greece. *Eur J Clin Microbiol Infect Dis* **2008**; 27:831-837.
46. Vourli S, Vagiakou H, Ganteris G, et al. High rates of community-acquired, Pantone-Valentine leukocidin (PVL)-positive methicillin-resistant *S. aureus* (MRSA) infections in adult outpatients in Greece. *Euro Surveill* **2009**; 14:1-4.
47. Witte W, Strommenger B, Cuny C, Heuck D, Nuebel U. Methicillin-resistant *Staphylococcus aureus* containing the Pantone-Valentine leukocidin gene in Germany in 2005 and 2006. *J Antimicrob Chemother* **2007**; 60:1258-1263.
48. Antri K, Rouzic N, Boubekri I, et al. [High prevalence of community and hospital acquired infections of methicillin-resistant *Staphylococcus aureus* containing Pantone-Valentine leukocidin gene in Algiers]. *Pathol Biol (Paris)* **2010**; 58:e15-20.
49. Armand-Lefevre L, Ruimy R, Andrement A. Clonal comparison of *Staphylococcus aureus* isolates from healthy pig farmers, human controls, and pigs. *Emerg Infect Dis* **2005**; 11:711-714.
50. van Belkum A, Melles DC, Peeters JK, et al. Methicillin-resistant and -susceptible *Staphylococcus aureus* sequence type 398 in pigs and humans. *Emerg Infect Dis* **2008**; 14:479-483.
51. Witte W, Strommenger B, Stanek C, Cuny C. Methicillin-resistant *Staphylococcus aureus* ST398 in humans animals, Central Europe. *Emerg Infect Dis* **2007**; 13:255-258.
52. Golding G, Bryden L, Levett PN, et al. Livestock-associated methicillin-resistant *Staphylococcus aureus* sequence type 398 in humans, Canada. *Emerg Infect Dis* **2010**; 16:587-94.
53. Smith TC, Male MJ, Harper AL, et al. Methicillin-resistant *Staphylococcus aureus* (MRSA) strain ST398 is present in midwestern U.S. swine and swine workers. *PLoS One* **2009**; 4:e4258.
54. Kadlec K, Ehrlich R, Monecke S, et al. Diversity of antimicrobial resistance pheno- and genotypes of methicillin-resistant *Staphylococcus aureus* ST398 from diseased swine. *J Antimicrob Chemother* **2009**; 64:1156-1164.
55. Durand G, Bes M, Meugnier H, et al. Detection of new methicillin-resistant *Staphylococcus aureus* clones containing the toxic shock syndrome toxin 1 gene responsible for hospital- community-acquired infections in France. *J Clin Microbiol* **2006**; 44: 847-853.
56. Raulin O, Durand G, Gillet Y, et al. Toxin profiling of *Staphylococcus aureus* strains involved in varicella superinfection. *J Clin Microbiol* **2010**; 48:1696-1700.
57. Boyle-Vavra S, Ereshefsky B, Wang CC, Daum R. Successful multi-resistant community-associated methicillin-resistant *Staphylococcus aureus* lineage from Taipei, Taiwan, that carries either the novel *Staphylococcal* chromosome cassette *mec* (SCC *mec*) type VT or SCC *mec* type IV. *J Clin Microbiol* **2005**; 43:4719-4730.
58. Ho PL, Chuang SK, Choi YF, et al. Community-associated methicillin-resistant and methicillin-sensitive *Staphylococcus aureus*: Skin and soft tissue infections in Hong Kong. *Diagn Microbiol Infect Dis* **2008**; 61:245-250.
59. Hsu LY, Koh YL, Chlebicka NL, et al. Establishment of ST30 as the predominant clonal type among community-associated methicillin-resistant *Staphylococcus aureus* isolates in Singapore. *J Clin Microbiol* **2006**; 44:1090-1093.
60. Hisata K, Kuwahara-Arai K, Yamanoto M, et al. Dissemination of methicillin-resistant staphylococci among healthy Japanese children. *J Clin Microbiol* **2005**; 43:3364-3372.
61. Reyes J, Rincón S, Díaz L, et al. Dissemination of methicillin-resistant *Staphylococcus aureus* USA300 sequence type 8 lineage in Latin America. *Clin Infect Dis* **2009**; 49:1861-1867.
62. Ma XX, Galiana A, Pedreira W, et al. Community-acquired methicillin-resistant *Staphylococcus aureus*, Uruguay. *Emerg Infect Dis* **2005**; 11:973-976.
63. Benoit SR, Estivariz C, Mogdasy C, et al. Community strains of methicillin-resistant *Staphylococcus aureus* as potential cause of healthcare-associated infections, Uruguay, 2002-2004. *Emerg Infect Dis* **2008**; 14:1216-1223.
64. Coombs GW, Pearson JC, O'Brien FG, Murray RJ, Grubb WB, Christiansen KJ. Methicillin-resistant *Staphylococcus aureus* clones, Western Australia. *Emerg Infect Dis* **2006**; 12:241-247.
65. Tong SY, Bishop EJ, Lilliebridge RA, et al. Community-associated strains of methicillin-resistant *Staphylococcus aureus* and methicillin-susceptible *S. aureus* in indigenous Northern Australia: Epidemiology and outcomes. *J Infect Dis* **2009**; 199:1461-1470.
66. McDonald M, Dougall A, Holt D, et al. Use of a single-nucleotide polymorphism genotyping system to demonstrate the unique epidemiology of methicillin-resistant *Staphylococcus aureus* in remote aboriginal communities. *J Clin Microbiol* **2006**; 44:3720-3727.
67. Smith JM, Cook GM. A decade of community MRSA in New Zealand. *Epidemiol Infect* **2005**; 133:899-904.
68. Nimmo GR, Coombs GW, Pearson JC, et al. Methicillin-resistant *Staphylococcus aureus* in the Australian community: An evolving epidemic. *Med J Aust* **2006**; 184:384-388.
69. Kaplan SL. Treatment of community-associated methicillin-resistant *Staphylococcus aureus* infections. *Pediatr Infect Dis J* **2005**; 24:457-8.
70. Grayson ML. The treatment triangle for staphylococcal infections. *N Engl J Med* **2006**; 355:724-727.
71. Rajendran PM, Young D, Maurer T, et al. Randomized, double-blind, placebo-controlled trial of cephalexin for treatment of uncomplicated skin abscesses in a population at risk for community-acquired methicillin-resistant *Staphylococcus aureus* infection. *Antimicrob Agents Chemother* **2007**; 51:4044-4048.
72. Chambers HF, Moellering RC, Kamitsuka P. Clinical decisions: management of skin and soft-tissue infection. *N Engl J Med* **2008**; 359:1063-1067.
73. Duong M, Markwell S, Peter J, Barenkamp S. Randomized, controlled trial of antibiotics in the management of community-acquired skin abscesses in the pediatric patient. *Ann Emerg Med* **2010**; 55:401-407.
74. Schmitz GR, Bruner D, Pitotti R, et al. Randomized controlled trial of trimethoprim-sulfamethoxazole for uncomplicated skin abscesses in patients at risk for community-associated methicillin-resistant *Staphylococcus aureus* infection. *Ann Emerg Med* **2010**; 56:283-287.
75. Frank AL, Marcink JF, Mangat PD, et al. Clindamycin treatment of methicillin-resistant *Staphylococcus aureus* infections in children. *Pediatr Infect Dis J* **2002**; 21:530-534.
76. Szumowski JD, Cohen DE, Kanaya F, Mayer KH. Treatment and outcomes of infections by methicillin-resistant *Staphylococcus aureus* at an ambulatory clinic. *Antimicrob Agents Chemother* **2007**; 51:423-428.
77. Ruhe JJ, Menon A. Tetracyclines as an oral treatment option for patients with community onset skin soft tissue infections caused by methicillin-resistant *Staphylococcus aureus*. *Antimicrob Agents Chemother* **2007**; 51:3298-303.
78. Cenzal MJ, Skiest D, Lubner S, et al. Prospective randomized trial of empiric therapy with trimethoprim-sulfamethoxazole or doxycycline for outpatient skin and soft tissue infections in an area of high prevalence of methicillin-resistant *Staphylococcus aureus*. *Antimicrob Agents Chemother* **2007**; 51:2628-3260.
79. Nathwani D, Morgan M, Masterton RG, et al. Guidelines for UK practice for the diagnosis and management of methicillin-resistant

- Staphylococcus aureus* (MRSA) infections presenting in the community. *J Antimicrob Chemother* **2008**; 61:976–994.
80. Howden BP, Grayson ML. Dumb and dumber—the potential waste of a useful antistaphylococcal agent: Emerging fusidic acid resistance in *Staphylococcus aureus*. *Clin Infect Dis* **2006**; 42:394–400.
  81. Patel JB, Gorwitz RJ, Jernigan JA. Mupirocin resistance. *Clin Infect Dis* **2009**; 49:935–941.
  82. Chua K, Howden BP. Treating Gram-positive infections: vancomycin update the whys, wherefores and evidence base for continuous infusion and of anti-Gram-positive antibiotics. *Curr Opin Infect Dis* **2009**; 22:525–534.
  83. Wunderink RG, Cammarata SK, Oliphant TH, Kollef MH. Continuation of a randomized, double-blind, multicenter study of linezolid versus vancomycin in the treatment of patients with nosocomial pneumonia. *Clin Ther* **2003**; 25:980–992.
  84. Kalil AC, Puumala SE, Stoner J. Unresolved questions with the use of linezolid vs vancomycin for nosocomial pneumonia. *Chest* **2004**; 125:2370–2371.
  85. Powers JH, Ross DB, Lin D, Soreth J. Linezolid and vancomycin for methicillin-resistant *Staphylococcus aureus* nosocomial pneumonia: the subtleties of subgroup analyses. *Chest* **2004**; 126:314–315.
  86. Rubinstein E, Cammarata S, Oliphant T, Wunderink R. Linezolid (PNU-100766) versus vancomycin in the treatment of hospitalized patients with nosocomial pneumonia: a randomized, double-blind, multicenter study. *Clin Infect Dis* **2001**; 32:402–412.
  87. Wunderink RG, Rello J, Cammarata SK, Croos-Dabrera RV, Kollef MH. Linezolid vs vancomycin: analysis of two double-blind studies of patients with methicillin-resistant *Staphylococcus aureus* nosocomial pneumonia. *Chest* **2003**; 124:1789–1797.
  88. Stevens DL, Herr D, Lampiris H, Hunt JL, Batts DH, Hafkin B. Linezolid versus vancomycin for the treatment of methicillin-resistant *Staphylococcus aureus* infections. *Clin Infect Dis* **2002**; 34:1481–1490.
  89. Jaksic B, Martinelli G, Perez-Oteyza J, Hartman CS, Leonard LB, Tack KJ. Efficacy and safety of linezolid compared with vancomycin in a randomized, double-blind study of febrile neutropenic patients with cancer. *Clin Infect Dis* **2006**; 42:597–607.
  90. Kohno S, Yamaguchi K, Aikawa N, et al. Linezolid versus vancomycin for the treatment of infections caused by methicillin-resistant *Staphylococcus aureus* in Japan. *J Antimicrob Chemother* **2007**; 60:1361–1369.
  91. Wunderink RG, Mendelson MH, Somero MS, et al. Early microbiological response to linezolid vs vancomycin in ventilator-associated pneumonia due to methicillin-resistant *Staphylococcus aureus*. *Chest* **2008**; 134:1200–1207.
  92. Wilcox MH, Tack KJ, Bouza E, et al. Complicated skin and skin-structure infections and catheter-related bloodstream infections: noninferiority of linezolid in a phase 3 study. *Clin Infect Dis* **2009**; 48:203–212.
  93. Fowler VG, Boucher HW, Corey GR, et al. Daptomycin versus standard therapy for bacteremia and endocarditis caused by *Staphylococcus aureus*. *N Engl J Med* **2006**; 355:653–665.
  94. Rehm SJ, Boucher H, Levine D, et al. Daptomycin versus vancomycin plus gentamicin for treatment of bacteraemia and endocarditis due to *Staphylococcus aureus*: Subset analysis of patients infected with methicillin-resistant isolates. *J Antimicrob Chemother* **2008**; 62:1413–14121.
  95. Florescu I, Beuran M, Dimov R, et al. Efficacy and safety of tigecycline compared with vancomycin or linezolid for treatment of serious infections with methicillin-resistant *Staphylococcus aureus* or vancomycin-resistant enterococci: a phase 3, multicentre, double-blind, randomized study. *J Antimicrob Chemother* **2008**; 62(suppl 1):i17–28.
  96. Gardiner D, Dukart G, Cooper A, Babinchak T. Safety and efficacy of intravenous tigecycline in subjects with secondary bacteremia: pooled results from 8 phase III clinical trials. *Clin Infect Dis* **2010**; 50:229–38.
  97. Dumitrescu O, Boisset S, Badiou C, et al. Effect of antibiotics on *Staphylococcus aureus* producing Pantone-Valentine leukocidin. *Antimicrob Agents Chemother* **2007**; 51:1515–1519.
  98. Stevens D, Ma Y, Salmi D, McIndoo E, Wallace RJ, Bryant A. Impact of antibiotics on expression of virulence-associated exotoxin genes in methicillin-sensitive and methicillin-resistant *Staphylococcus aureus*. *J Infect Dis* **2007**; 195:202–311.
  99. Deresinski S. Vancomycin in combination with other antibiotics for the treatment of serious methicillin-resistant *Staphylococcus aureus* infections. *Clin Infect Dis* **2009**; 49:1072–1079.
  100. Morgan MS. Diagnosis and treatment of Pantone-Valentine leukocidin (PVL)-associated staphylococcal pneumonia. *Int J Antimicrob Agents* **2007**; 30:289–296.
  101. Gauduchon V, Cozon G, Vandenesch F, et al. Neutralization of *Staphylococcus aureus* Pantone Valentine leukocidin by intravenous immunoglobulin in vitro. *J Infect Dis* **2004**; 189:346–253.
  102. Yoong P, Pier GB. Antibody-mediated enhancement of community-acquired methicillin-resistant *Staphylococcus aureus* infection. *Proc Natl Acad Sci U S A* **2010**; 107:2241–2246.
  103. van Rijen MM, Bonten M, Wenzel RP, Kluytmans JA. Intranasal mupirocin for reduction of *Staphylococcus aureus* infections in surgical patients with nasal carriage: a systematic review. *J Antimicrob Chemother* **2008**; 61:254–261.
  104. van Rijen M, Bonten M, Wenzel R, Kluytmans J. Mupirocin ointment for preventing *Staphylococcus aureus* infections in nasal carriers. *Cochrane Database Syst Rev* **2008**; 1(4):CD006216.
  105. Ellis MW, Griffith ME, Dooley DP, et al. Targeted intranasal mupirocin to prevent colonization and infection by community-associated methicillin-resistant *Staphylococcus aureus* strains in soldiers: A cluster randomized controlled trial. *Antimicrob Agents Chemother* **2007**; 51:3591–3598.
  106. McDougal LK, Fosheim GE, Nicholson A, et al. Emergence of resistance among USA300 methicillin-resistant *Staphylococcus aureus* isolates causing invasive disease in the United States. *Antimicrob Agents Chemother* **2010**; 54:3804–3811.
  107. Smith K, Gemmell CG, Hunter IS. The association between biocide tolerance and the presence or absence of *qac* genes among hospital-acquired and community-acquired MRSA isolates. *J Antimicrob Chemother* **2008**; 61:78–84.
  108. Bartels MD, Kristoffersen K, Boye K, Westh H. Rise subsequent decline of community-associated methicillin resistant *Staphylococcus aureus* ST30-IVc in Copenhagen, Denmark through an effective search and destroy policy. *Clin Microbiol Infect* **2010**; 16:78–83.
  109. Campbell KM, Vaughn AF, Russell KL, et al. Risk factors for community-associated methicillin-resistant *Staphylococcus aureus* infections in an outbreak of disease among military trainees in San Diego, California, in 2002. *J Clin Microbiol* **2004**; 42:4050–4053.
  110. Longtin Y, Sudre P, François P, et al. Community-associated methicillin-resistant *Staphylococcus aureus*: Risk factors for infection, and long-term follow-up. *Clin Microbiol Infect* **2009**; 15: 552–559.
  111. Urth T, Juul G, Skov R, Schønheyder HC. Spread of a methicillin-resistant *Staphylococcus aureus* ST80-IV clone in a Danish community. *Infect Control Hosp Epidemiol* **2005**; 26:144–149.
  112. Romano R, Lu D, Holtom P. Outbreak of community-acquired methicillin-resistant *Staphylococcus aureus* skin infections among a collegiate football team. *J Athl Train* **2006**; 41:141–145.
  113. Nguyen DM, Mascola L, Brancourt E. Recurring methicillin-resistant *Staphylococcus aureus* infections in a football team. *Emerg Infect Dis* **2005**; 11:526–32.
  114. Rahimian J, Khan R, LaScalea KA. Does nasal colonization or mupirocin treatment affect recurrence of methicillin-resistant *Staphylococcus aureus* skin and skin structure infections? *Infect Control Hosp Epidemiol* **2007**; 28:1415–1416.
  115. Yang ES, Tan J, Eells S, Rieg G, Tagudar G, Miller LG. Body site colonization in patients with community-associated methicillin-resistant *Staphylococcus aureus* and other types of *S. aureus* skin infections. *Clin Microbiol Infect* **2010**; 16:425–431.
